# Supplementary material
Source: publisher figshare collection journal article supplement (https://acs.figshare.com/ndownloader/files/4720216)
Supplement: Supplementary file 1 [file 4720216]

## Supplemental Information:

### Reaction of the Hydroxyl Radical with Phenol in Water up to Supercritical Conditions

Julien Bonin, Ireneusz Janik, Dorota Janik and David M. Bartels\*

*Radiation Laboratory, University of Notre Dame, Notre Dame, Indiana 46556*

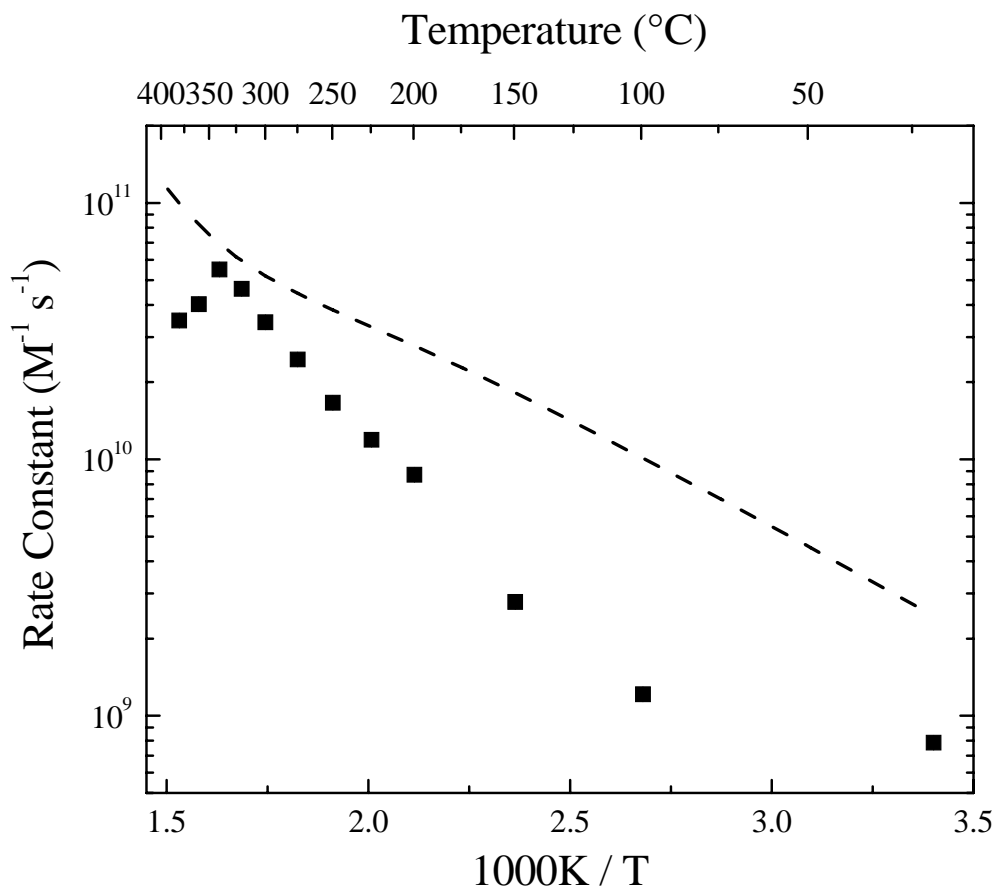

**Figure S1.** Arrhenius plot of the effective second-order rate constant of radical recombination (average of reactions (9)-(14), see text for details), compared with an estimate of the diffusion limit from the Smoluchowski equation  $k_{diff} = \beta 4\pi R D$ . The spin factor  $\beta = 1/4$ , reaction distance  $R$  is taken as 0.7 nm, and relative diffusion coefficient  $D$  is  $2.0 \times 10^{-9} \text{ m}^2 \text{ s}^{-1}$  at room temperature, scaled vs. temperature by multiplication by  $T / \text{viscosity}$ . Clearly the effective second order decay rates are physically reasonable.
